# Supplementary material for: Three new POM-based compounds constructed by rigid thiabendazole and flexible bis(pyrazole) ligands: structures and properties for Hg2+ recognition
Source: Royal Society of Chemistry journal article supplement (doi:10.1039/c5dt02420j), 2015-01-01
Supplement: c5dt02420j1.pdf [file c5dt02420j1.pdf]

Supplementary Material (ESI) for Dalton Transactions  
This journal is © The Royal Society of Chemistry

## Two new POM-based compounds constructed by rigid thiabendazole and flexible bis(pyrazole) ligands: structures and properties for Hg<sup>2+</sup> recognition

Aixiang Tian,\* Yali Ning, Yang Yang, Xue Hou, Jun Ying, Guocheng Liu, Juwen  
Zhang, Xiuli Wang\*

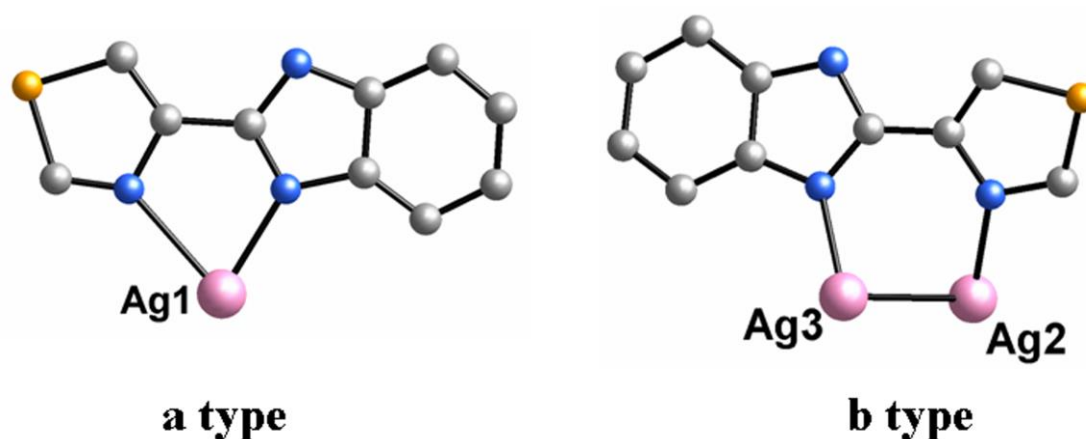

Fig. S1. Two types of coordination modes of tbz ligand in compound 1.

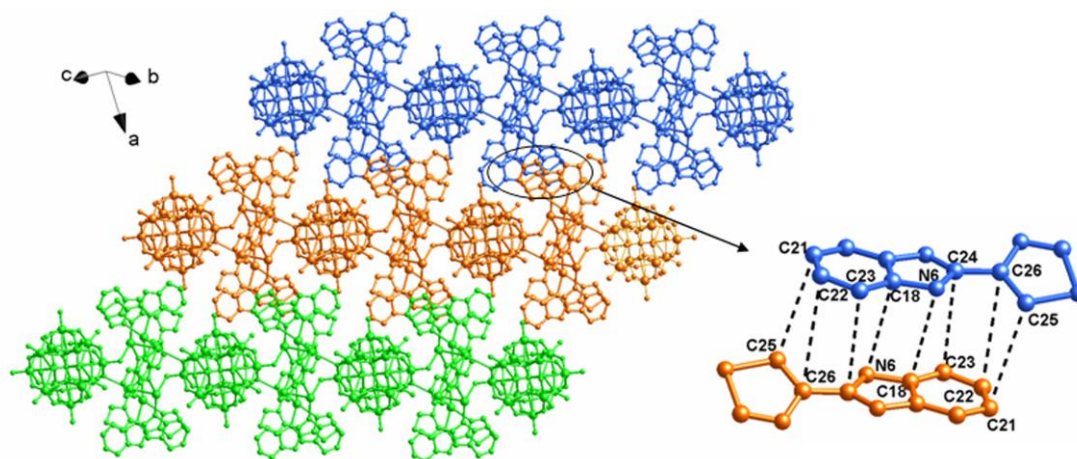

Fig. S2. A 2D supramolecular layer in 1 constructed by abundant  $\pi \dots \pi$  stacking interactions between adjacent 1D chains.

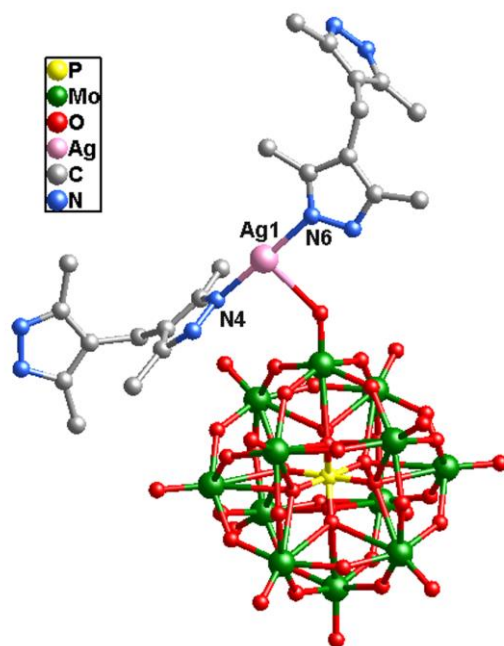

**Fig. S3.** Ball/stick view of the asymmetric unit of **2**. The hydrogen atoms and crystal water molecules are omitted for clarity.

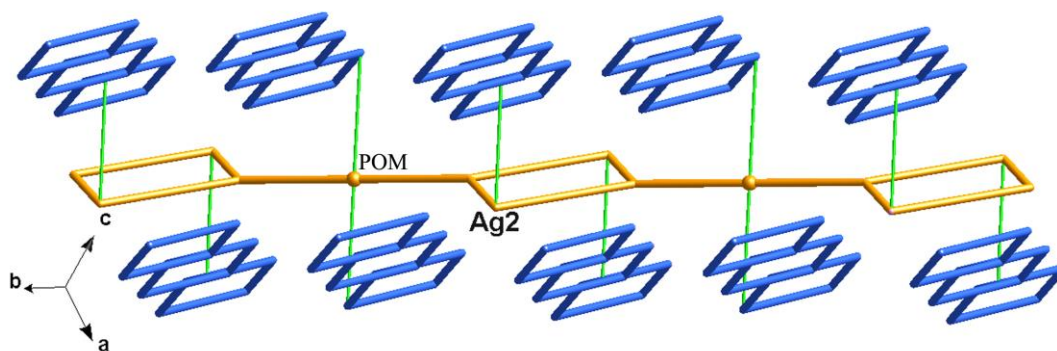

**Fig. S4.** The chain (orange) is vertical with its adjacent linking chains (blue).

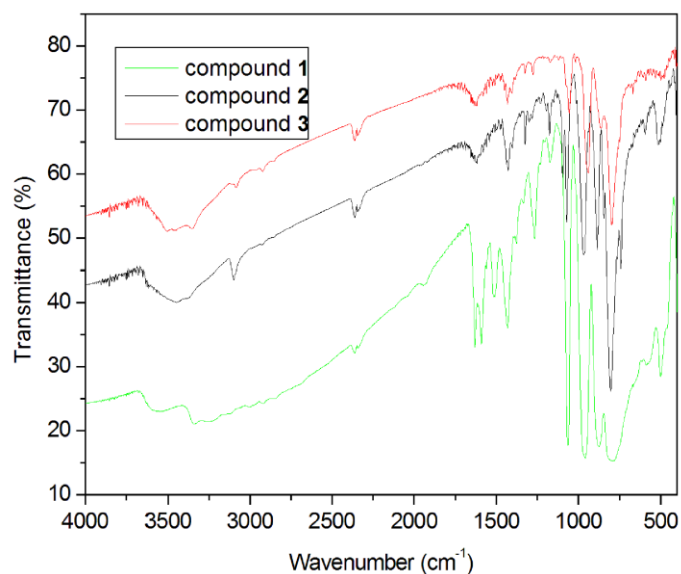

**Fig. S5.** The IR spectra of compounds **1–3**.

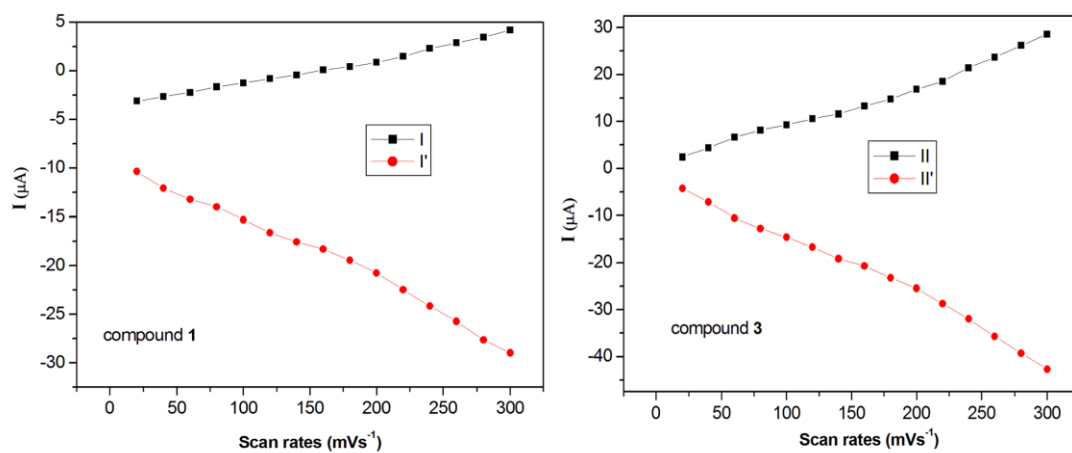

**Fig. S6.** The dependence of anodic peak (I for **1**–CPE, II for **3**–CPE) and cathodic peak (I' for **1**–CPE, II' for **3**–CPE) currents on scan rates.

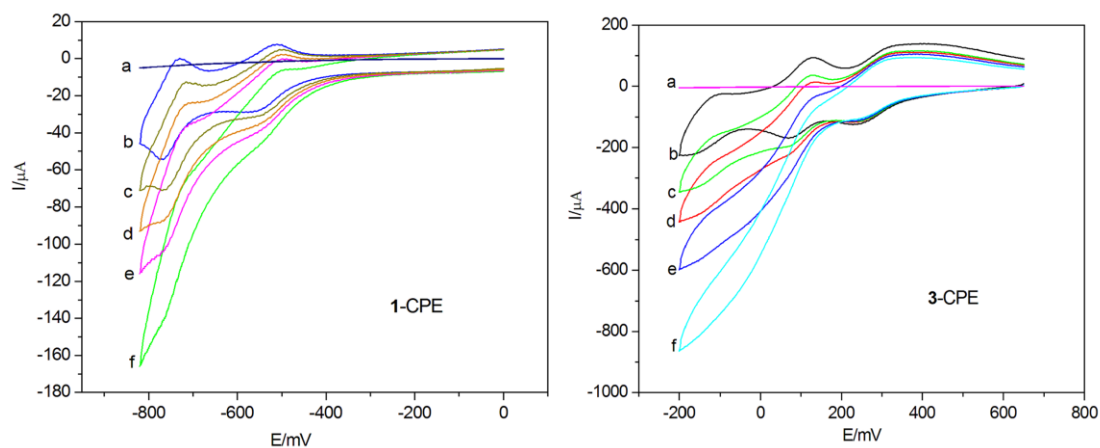

**Fig. S7.** Cyclic voltammograms of the **1**- and **3**-CPEs in 0.1M  $\text{H}_2\text{SO}_4$  + 0.5M  $\text{Na}_2\text{SO}_4$  aqueous solution containing 0(b); 2(c); 4(d); 6(e) and 8(f) mM  $\text{H}_2\text{O}_2$  and a bare CPE (a) in a 4.0 mM  $\text{H}_2\text{O}_2$  + 0.1M  $\text{H}_2\text{SO}_4$  + 0.5M  $\text{Na}_2\text{SO}_4$  solution. Scan rate:  $200 \text{ mV}\cdot\text{s}^{-1}$ .

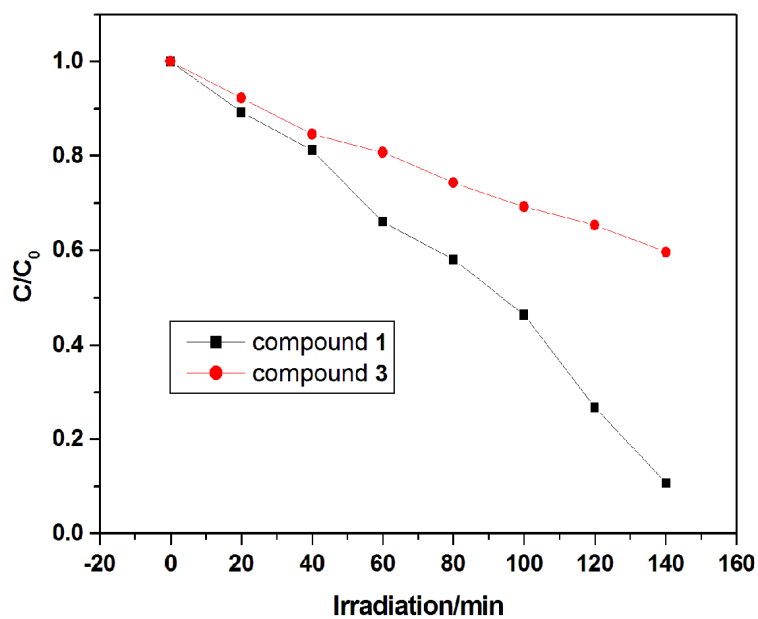

**Fig. S8.** Photocatalytic decomposition rate of the MB solution under UV irradiation with the use of the title compounds **1** and **3**.

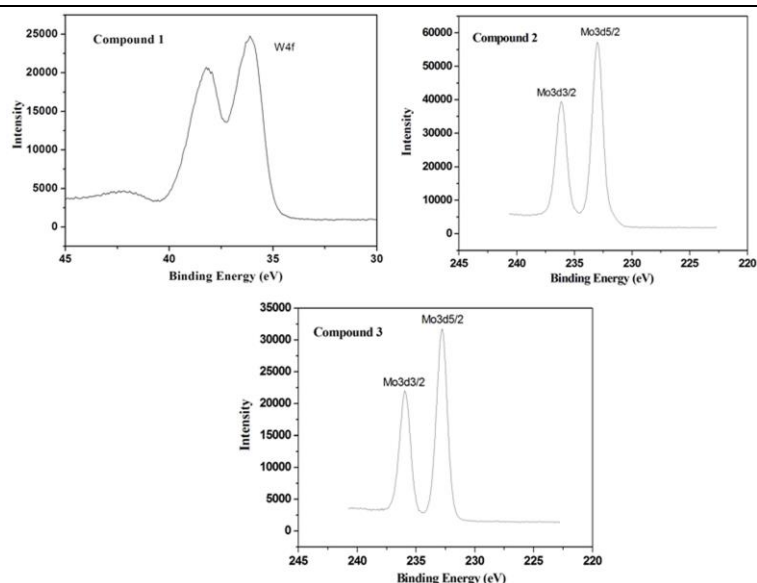

**Fig. S9.** The XPS spectra of compounds **1–3** and the results exhibit that the oxidation states of Mo and W atoms in compounds **1–3** are in +VI oxidation state.

Table S1. Selected Bond Lengths (Å) and Bond Angles (°) for Compounds **1–3**.

| Compound 1  |            |            |            |
|-------------|------------|------------|------------|
| Ag1-N1      | 2.105(9)   | Ag1-N5     | 2.160(9)   |
| Ag1-N3      | 2.454(11)  | Ag1-Ag2    | 3.1452(14) |
| Ag2-C7      | 2.149(9)   | Ag2-N8     | 2.150(9)   |
| Ag2-Ag3     | 2.9334(14) | Ag2-O9     | 2.773(3)   |
| Ag3-N2      | 2.153(9)   | Ag3-N7     | 2.152(9)   |
| Ag3-O7      | 2.763(11)  | C26-S2     | 1.710(12)  |
| C27-S2      | 1.678(12)  | S1-C9      | 1.699(16)  |
| S1-C8       | 1.718(17)  | N1-Ag1-N5  | 161.4(4)   |
| N1-Ag1-N3   | 125.1(4)   | N5-Ag1-N3  | 73.0(4)    |
| N1-Ag1-Ag2  | 63.3(3)    | N5-Ag1-Ag2 | 100.2(3)   |
| N3-Ag1-Ag2  | 141.6(3)   | C7-Ag2-N8  | 171.9(4)   |
| C7-Ag2-Ag3  | 100.4(3)   | N8-Ag2-Ag3 | 78.5(2)    |
| C7-Ag2-Ag1  | 65.7(3)    | N8-Ag2-Ag1 | 106.2(2)   |
| Ag3-Ag2-Ag1 | 91.12(4)   | N2-Ag3-N7  | 149.0(3)   |
| N2-Ag3-Ag2  | 84.6(3)    | N7-Ag3-Ag2 | 85.6(2)    |
| C9-S1-C8    | 89.3(7)    | C27-S2-C26 | 89.6(6)    |
| Compound 2  |            |            |            |
| Ag1-N5      | 2.122(6)   | Ag1-N1     | 2.134(7)   |
| N5-Ag1-N1   | 176.9(3)   |            |            |
| Compound 3  |            |            |            |
| Ag1-N5      | 2.134(5)   | Ag1-N3     | 2.173(6)   |
| Ag1-Ag2     | 3.2165(10) | Ag1-O8     | 2.663(6)   |
| Ag2-N6      | 2.115(6)   | Ag2-N2     | 2.120(6)   |
| Ag2-O20     | 2.744(6)   | C10-S1     | 1.671(13)  |
| C9-S1       | 1.698(9)   | N5-Ag1-N3  | 178.6(3)   |

**Supplementary Material (ESI) for Dalton Transactions**  
**This journal is © The Royal Society of Chemistry**

|            |            |            |            |
|------------|------------|------------|------------|
| N5-Ag1-Ag2 | 100.19(16) | N3-Ag1-Ag2 | 78.4(2)    |
| N6-Ag2-N2  | 167.6(3)   | N6-Ag2-Ag1 | 120.65(19) |
| N2-Ag2-Ag1 | 68.84(19)  | C10-S1-C9  | 90.4(5)    |

Table S2. The Mo and W oxidation states in compounds **1–3** through BVS.

| <b>1</b> |       | <b>2</b> |       |      |       | <b>3</b> |       |
|----------|-------|----------|-------|------|-------|----------|-------|
| W1       | 6.431 | Mo1      | 6.202 | Mo7  | 6.355 | Mo1      | 6.311 |
| W2       | 6.396 | Mo2      | 6.235 | Mo8  | 6.314 | Mo2      | 6.167 |
| W3       | 6.537 | Mo3      | 6.438 | Mo9  | 6.453 | Mo3      | 6.263 |
| W4       | 6.671 | Mo4      | 6.491 | Mo10 | 6.429 | Mo4      | 6.176 |
| W5       | 6.453 | Mo5      | 6.277 | Mo11 | 6.467 | Mo5      | 6.066 |
| W6       | 6.555 | Mo6      | 6.677 | Mo12 | 6.779 | Mo6      | 6.531 |
